# Supplementary material
Source: Springer Nature journal article supplement (https://www.springermedizin.de/resource/supplementary/40170_2014_130_MOESM4_ESM.pdf/25787632)

**A**  
**Mitochondrial respiration**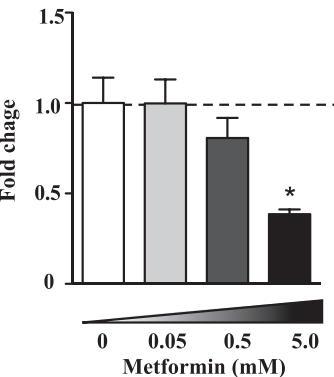**B**  
**Coupled respiration**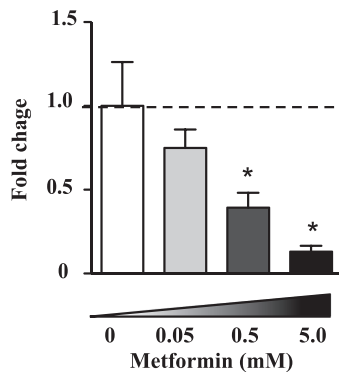**C**  
**Uncoupled respiration**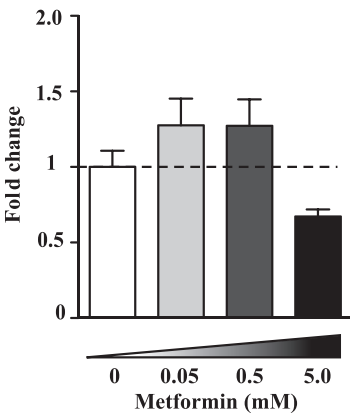**D**  
**Mitochondrial coupling status**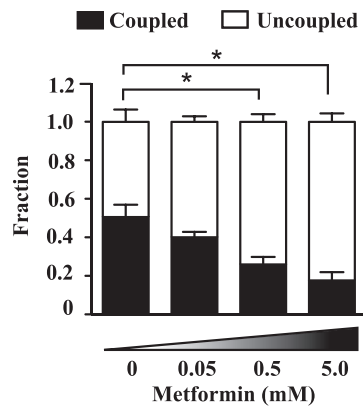

Supplement: MOESM4 [file 25787632]
